# Supplementary material for: Transgene integration causes RARB downregulation in homozygous Tg4–42 mice
Source: PubMed Central journal article supplement (PMC7156671; doi:10.1038/s41598-020-63512-8), 2020-04-14
Supplement: 41598_2020_63512_MOESM1_ESM.pdf [file 41598_2020_63512_MOESM1_ESM.pdf]

## Supplementary Information

### Transgene integration causes RARB downregulation in homozygous Tg4-42 mice

Barbara Hinteregger, Tina Loeffler, Stefanie Flunkert, Joerg Neddens, Ruth Birner-Gruenberger, Thomas A. Bayer, Tobias Madl, Birgit Hutter-Paier

### Complete Gene Sequencing Report Cergentis (Utrecht, Netherlands)

#### Goal:

In this study a transgenic mouse Tg4-42 (TBA83) line was analyzed.

The aim of this experiment was to determine:

1. the integration site(s) of the transgene (TG)
2. assess the presence of structural variants surrounding the transgene integration site
3. assess the transgene sequence itself
4. estimate the TG copy number

#### Summary of the Results:

| Name                | Integration site(s)      | Estimated Copy nr | SV  |
|---------------------|--------------------------|-------------------|-----|
| TBA83; Mouse spleen | mChr14:17431476-17474599 | >20x              | yes |

#### Experiment:

##### TLA sample prep:

Isolated mouse spleen sample from the transgenic line was used for TLA sample prep.

##### TLA PCR:

Two primer pairs (set 6-7) were designed for the mouse TG.

Primers used in the analysis:

| # | Name            | position | Sequence             |
|---|-----------------|----------|----------------------|
| 6 | THR-Abeta4-42-F | TG:4350  | CTGCCTTAGATTCCTGGATC |
|   | THR-Abeta4-42-R | TG:4121  | GACTTGGATTCTGTGGTGG  |
| 7 | Thy-F           | TG:5839  | CAAATCAATGCGCATTCTCT |
|   | Thy-R           | TG:5578  | TTTCTTTCCTCGGTGAGATG |

The primer sets were used in individual TLA amplifications. PCR products were purified and library prepped using the Illumina NexteraXT protocol and sequenced on an Illumina Miseq sequencer. Reads were mapped using BWA-SW, which is a Smith-Waterman alignment tool. This allows partial mapping which is optimally suited for identifying break spanning reads. For mapping the mouse genome version mm9 was used.

## Results - Integration site:

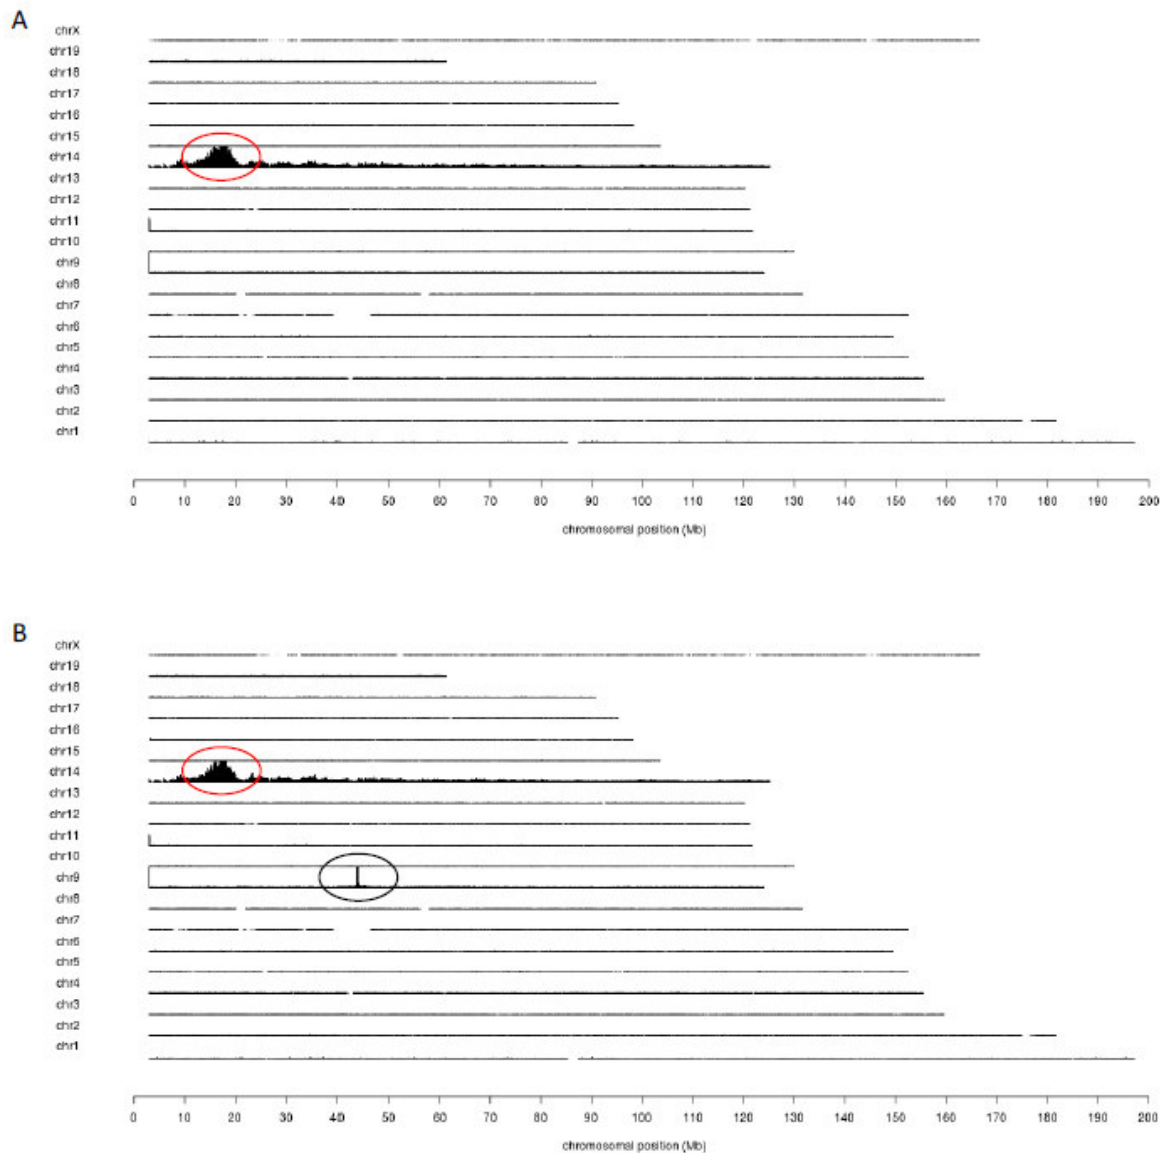

TLA sequence coverage across the mouse genome using primer set 6 (panel A) and set 7 (panel B). The different chromosomes are indicated on the y-axis, the chromosomal position on the x-axis. Similar results were obtained for both primer sets except using set 7 an additional coverage peak is found on the mouse *Thy1* gene as expected (black circle). Encircled in red is the region containing the transgene integration site.

Using TLA highest coverage is observed on the sequences directly surrounding the location of the primer set. Here high coverage is observed on chr14 indicating this is the chromosome where the TG has integrated. Within chr14 highest coverage is observed in the region 15-25MB. Within this region the following fusion reads were identified marking the exact TG integration.

5' fusion read: mChr14:17431476 (forw) fused to TG:4345 (forw)

```
..GTGCTCCTGCCTGCAGTCAGGATGAACCCCTTCTAAGATGATCTACAGCATTGCC  
CCCACTCACTGGTGTGCTGCCTTAGATTCTGGATCACAAAACGCTTCCGACATGAC  
TCAGGATATGAAGTTCATCATCAAAAATTGGTGTCTTTG..
```

3' fusion read: TG:6724 (rev) fused to mChr14:17474599 (forw)

```
..GCCTCAGAGAGCACCCGCATCTCCCTAAGAACTGAGAGTGTGGTCACGGAGATG  
TCCAGGGA  
AGAGCACCTAGTGTGACAGAGACCACATCATATGACTCTGTAGGCAAGTCTGCTG  
CAGATCGCCTTTGGCACCCCTTCAACTGCCGACAA..
```

As a result the TG was found to be integrated at mChr14:17431476-17474599 deleting all sequences in between.

### Results - Transgene Sequence:

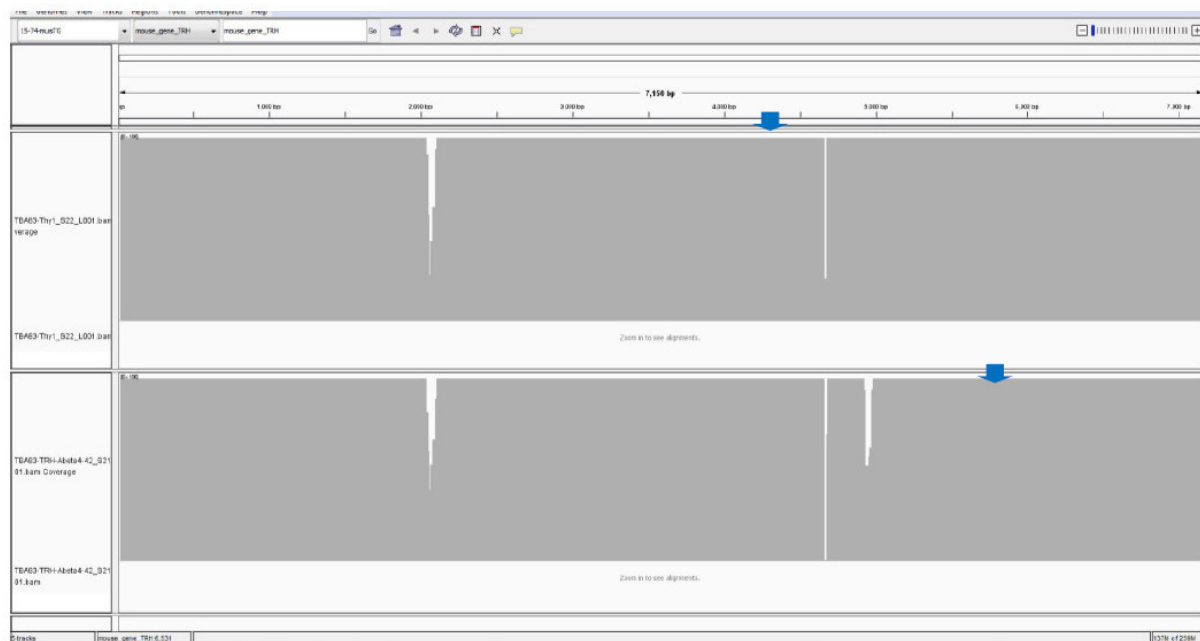

IGV screenshot of the TLA sequence coverage across the TG. Sequence coverage (in grey) generated with the different primer sets are depicted in the different panels as indicated. The positions of the primer sets on the TG sequence are indicated with the blue arrows. Y-axis is limited to 100x. Good coverage is observed across the TG except for TG:4642-4689 due to the high GC content of that region. From these data the following sequence variation was identified that was found with a frequency of minimal 10% using minimal 1 primer set. Complete tables are available from Cergentis upon request.

| SNVs |     |     | TBA83-Thy1 | TBA83-Thy1 | TBA83-TRH-Abeta4-42 | TBA83-TRH-Abeta4-42 |
|------|-----|-----|------------|------------|---------------------|---------------------|
| pos  | ref | alt | cov        | SNP_%      | cov                 | SNP_%               |
| 3692 | C   | T   | 996        | 17         | 44080               | 21                  |
| 3744 | C   | T   | 753        | 95         | 37852               | 99                  |
| 3761 | G   | T   | 835        | 94         | 42394               | 99                  |
| 3762 | C   | T   | 837        | 93         | 42420               | 98                  |
| 4961 | T   | G   | 12136      | 76         | 42                  | 100                 |
| 5136 | G   | A   | 47534      | 14         | 213                 | 14                  |
| 5298 | C   | T   | 71479      | 93         | 329                 | 100                 |
| 5996 | A   | G   | 50674      | 100        | 512                 | 100                 |
| 6645 | G   | A   | 3474       | 4          | 9773                | 21                  |

| INDELS |     |           | TBA83-Thy1 | TBA83-Thy1 | TBA83-TRH-Abeta4-42 | TBA83-TRH-Abeta4-42 |
|--------|-----|-----------|------------|------------|---------------------|---------------------|
| pos    | ref | alt       | cov        | SNP_%      | cov                 | SNP_%               |
| 4497   | A   | -6AGATGT  | 688        | 51         | 70302               | 64                  |
| 4505   | C   | -7AAGTAAG | 357        | 99         | 45594               | 99                  |
| 4941   | A   | -2GG      | 9920       | 31         | 40                  | 35                  |
| 4941   | A   | -3GGG     | 9920       | 8          | 40                  | 10                  |
| 5925   | A   | -1G       | 60539      | 92         | 476                 | 86                  |
| 5927   | A   | +2CC      | 56287      | 99         | 417                 | 97                  |
| 5953   | T   | -1G       | 78485      | 98         | 615                 | 98                  |
| 5987   | A   | +1G       | 74918      | 67         | 656                 | 77                  |
| 5989   | C   | -1G       | 50752      | 99         | 512                 | 99                  |
| 5991   | C   | -2CT      | 50750      | 99         | 512                 | 99                  |
| 6003   | A   | -1G       | 50800      | 100        | 512                 | 100                 |

### Results - Structural Variation:

The presence of fusion reads within the TG sequence allows for the detection of (potential) structural variation within the TG. Multiple fusion reads were identified in the TG sequence which are reported in the table below.

| #seq1          | pos1 | ori1 | seq2           | pos2 | ori2 |
|----------------|------|------|----------------|------|------|
| mouse_gene_TRH | 2350 | +    | mouse_gene_TRH | 3286 | +    |
| mouse_gene_TRH | 31   | +    | mouse_gene_TRH | 2749 | -    |
| mouse_gene_TRH | 2390 | -    | mouse_gene_TRH | 3286 | +    |

In addition the following read was found indicative of TG concatemers:

TG:7157 (forw) fused to 'Unknown' fused to TG:26 (forw)

GTCCTTATTCTCTCTCTACCTTCAGCCACTTAGTTTCCTACCTTAAGTCCTAGAATT  
GATCCTGGCGTAATAGCGAAGAGGCCCGCACCGGGGCTGCAGGAATTCAGAGAC  
CGGGAACCAAACCTAGCCTTTAAAAAACATAAGTACAGGAG

**Results - Copy number estimation:**

An exact copy number cannot be determined using TLA. However, an estimation can be made based on the number of integration sites, number of fusion reads and the ratio of coverage on the TG and genome integration site. Here the TG/genome coverage ratio can be determined best, being between 1250 and 3000x on the TG and ~10x and 75x at the integration site on chromosome 14. From this the TG copy number is estimated to be >20x.
